# Supplementary material for: Cohort profile: the Italian Network of Longitudinal Metropolitan Studies (IN-LiMeS), a multicentre cohort for socioeconomic inequalities in health monitoring
Source: PubMed Central journal article supplement — BMJ Open. 2018 Apr 20;8(4):e020572. doi: 10.1136/bmjopen-2017-020572 (PMC5914711; doi:10.1136/bmjopen-2017-020572), 2018-04-20
Supplement: bmjopen-2017-020572supp001.pdf [file bmjopen-2017-020572supp001.pdf]

Appendix Table 1: Detectable effect size\* on differences between Italians and immigrants by means of Mortality Rate Ratios (MRR) by sex and different mortality rates.

| Cohort               | Type                     | All-cause mortality (rate<br>≈ 1-4/1,000) |                    | Hypothetical cause-<br>specific mortality (rate<br>= 2/10,000) |         | Hypothetical cause-<br>specific mortality (rate<br>= 5/100,000) |         |
|----------------------|--------------------------|-------------------------------------------|--------------------|----------------------------------------------------------------|---------|-----------------------------------------------------------------|---------|
|                      |                          | MRR                                       | MRR                | MRR                                                            | MRR     | MRR                                                             | MRR     |
|                      |                          | Males                                     | Females            | Males                                                          | Females | Males                                                           | Females |
| <b>Turin</b>         | <i>Closed</i>            | 0.84                                      | 0.79               | 0.53                                                           | 0.52    | n/e                                                             | n/e     |
|                      | <i>Open</i>              | 0.90                                      | 0.87               | 0.72                                                           | 0.71    | 0.46                                                            | 0.45    |
| <b>Reggio Emilia</b> | <i>Closed</i>            | 0.65                                      | 0.53               | n/e                                                            | n/e     | n/e                                                             | n/e     |
|                      | <i>Open</i>              | 0.82                                      | 0.75               | 0.46                                                           | 0.44    | n/e                                                             | n/e     |
| <b>Venice</b>        | <i>Closed</i>            | 0.69                                      | 0.57               | n/e                                                            | n/e     | n/e                                                             | n/e     |
|                      | <i>Open</i> <sup>§</sup> | 0.84                                      | 0.79               | 0.29                                                           | 0.31    | n/e                                                             | n/e     |
| <b>Florence</b>      | <i>Closed</i>            | 0.56                                      | 0.47               | n/e                                                            | n/e     | n/e                                                             | n/e     |
|                      | <i>Open</i> <sup>§</sup> | 0.83                                      | 0.79               | 0.44                                                           | 0.44    | n/e                                                             | n/e     |
| <b>Rome</b>          | <i>Closed</i>            | 0.85                                      | 0.84               | 0.56                                                           | 0.61    | n/e                                                             | 0.25    |
|                      | <i>Open</i> <sup>§</sup> | 0.93                                      | 0.91               | 0.78                                                           | 0.79    | 0.57                                                            | 0.60    |
| <b>Pooled</b>        | <i>Closed</i>            | 0.92                                      | 0.90               | 0.73                                                           | 0.75    | 0.49                                                            | 0.51    |
|                      | <i>Open</i>              | 0.96 <sup>§§</sup>                        | 0.95 <sup>§§</sup> | 0.86                                                           | 0.87    | 0.73                                                            | 0.74    |

\* Estimation of the statistical power obtained using the software Gpower 3.1 and setting the following parameters: alfa = 0,05, beta = 0,2; total sample size: person years (observed and estimated); death rates in the reference population: death rates of Italians in the closed cohorts (follow-up 2001-2012); proportion of immigrants: person years.

<sup>§</sup> Estimation based on simulation.

<sup>§§</sup> Estimation based on all-cause mortality rate = 2/1,000.

n/e: not estimable
